# Supplementary material for: Rhodium–nickel bimetallic nanocatalysts: high performance of room-temperature hydrogenation
Source: Royal Society of Chemistry journal article supplement (doi:10.1039/c2cc37668g), 2012-11-16
Supplement: c2cc37668g.pdf [file c2cc37668g.pdf]

## Supporting Information

### Rhodium-nickel bimetallic nanocatalysts: high performance of room-temperature hydrogenation

Haohong Duan<sup>1</sup>, Dingsheng Wang<sup>1</sup>, Yuan Kou<sup>2</sup> and Yadong Li<sup>1\*</sup>

<sup>1</sup>Department of Chemistry and the State Key Laboratory of Low-Dimensional Quantum Physics, Tsinghua University, Beijing, 100084 (P. R. China), <sup>2</sup>Department of ..., Peking University, Beijing 1..., P. R. China

\*E-mail: [ydli@tsinghua.edu.cn](mailto:ydli@tsinghua.edu.cn)

#### Experimental Details

**Chemicals:** RhCl<sub>3</sub>·3H<sub>2</sub>O and Ni(acac)<sub>2</sub> were purchased from Alfa Aesar. ODA, ethanol, cyclohexane, phenol, benzene, cyclohexanone, cyclohexanol, cyclohexene, cyclohexane, styrene, ethylenzene, Benzalacetone, benzylacetone, Nitrobenzene, Aniline, 4-Chloronitrobenzene, 4-Chloroaniline were of analytical grade from the Beijing Chemical Factory of China. All the reagents used in this work were used without further purification.

**Synthesis:** In a typical synthesis of Rh<sub>0.67</sub>Ni<sub>0.33</sub> NCs, 2 mL of RhCl<sub>3</sub>·3H<sub>2</sub>O aqueous solution (0.05 mmol/mL) and 0.0128 g Ni(acac)<sub>2</sub> were mixed with 2 g of octadecylamine (ODA) and the resulting mixture was heated to 110 °C with strongly stirring to evaporate the water and form a transparent solution. The mixture was then injected into 6.6 g of ODA preheated at 250 °C with vigorous stirring. The solution turned black immediately with the formation of a precipitate. After reaction at 230 °C for 2 minutes, the precipitate was washed several times with ethanol, and then dispersed in a non-polar solvent such as cyclohexane. Rh<sub>x</sub>Ni<sub>1-x</sub> with 0 < x ≤ 1 were prepared using the same procedure of Rh<sub>0.67</sub>Ni<sub>0.33</sub> nanocrystals above except that the total molar amount of Rh and Ni was kept at 0.15 mmol.

In the synthesis of Ni NCs, 0.128 g Ni(acac)<sub>2</sub> were mixed with 8.6 g of ODA and the resulting mixture was heated to 230 °C and kept at this temperature for 5 min. The precipitate was washed several times with ethanol, and then dispersed in a non-polar solvent such as cyclohexane.

**Characterization:** Powder XRD patterns were recorded with a Bruker D8 ADVANCE X-ray powder diffractometer with Cu Kα radiation (λ = 1.5406 Å). The particle size and morphology of as-synthesized samples were determined by using Hitachi model H-800 transmission electron microscope and a JEOL-2010F high-resolution transmission electron microscope.

**Catalytic measurements:** The substrate and Rh<sub>x</sub>Ni<sub>1-x</sub> NCs solution (synthesized as described above) were placed in an autoclave. In a typical experiment, H<sub>2</sub> (40 bar) was introduced into the autoclave after the reactor was purged 3 times with H<sub>2</sub>. The mixture was stirred at 800 rpm at room temperature (25 °C) for the required time.

## Supplementary Figures

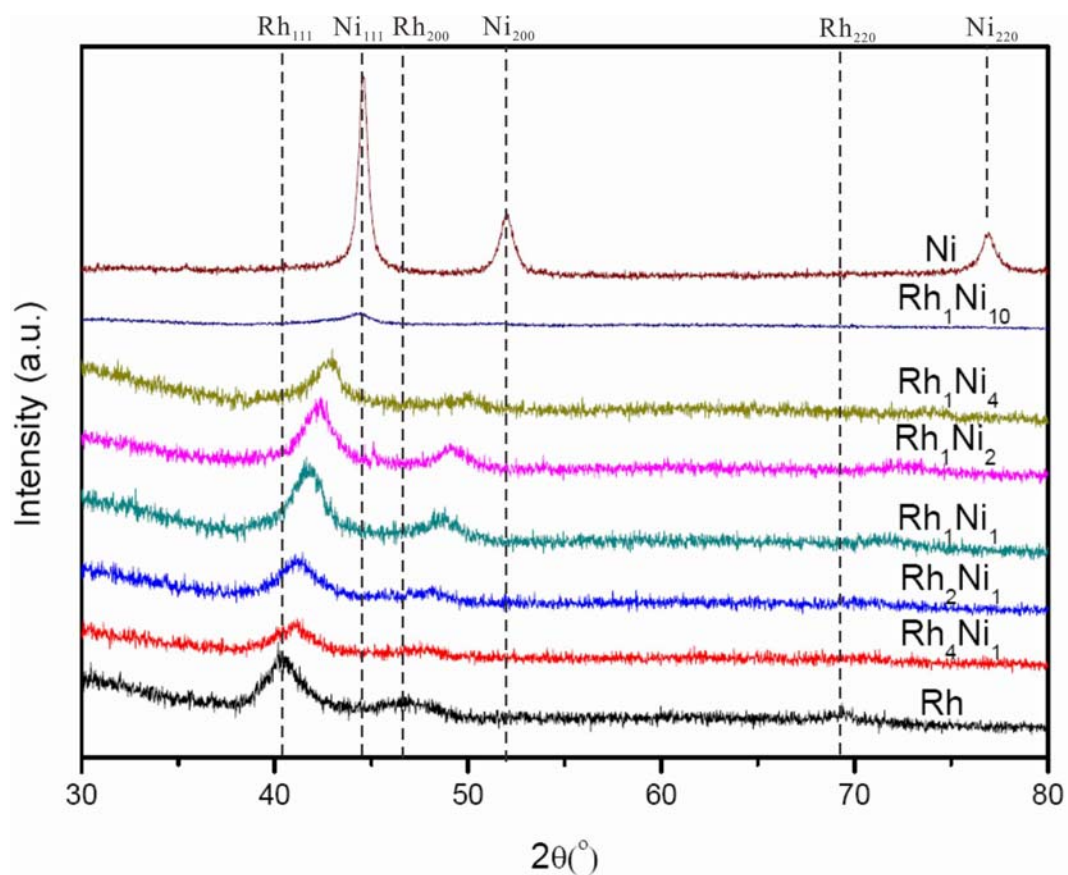

**Fig. S1.** The powder X-ray diffraction (XRD) patterns of the as-obtained Rh,  $Rh_xNi_{1-x}$ , and Ni nanocrystals.

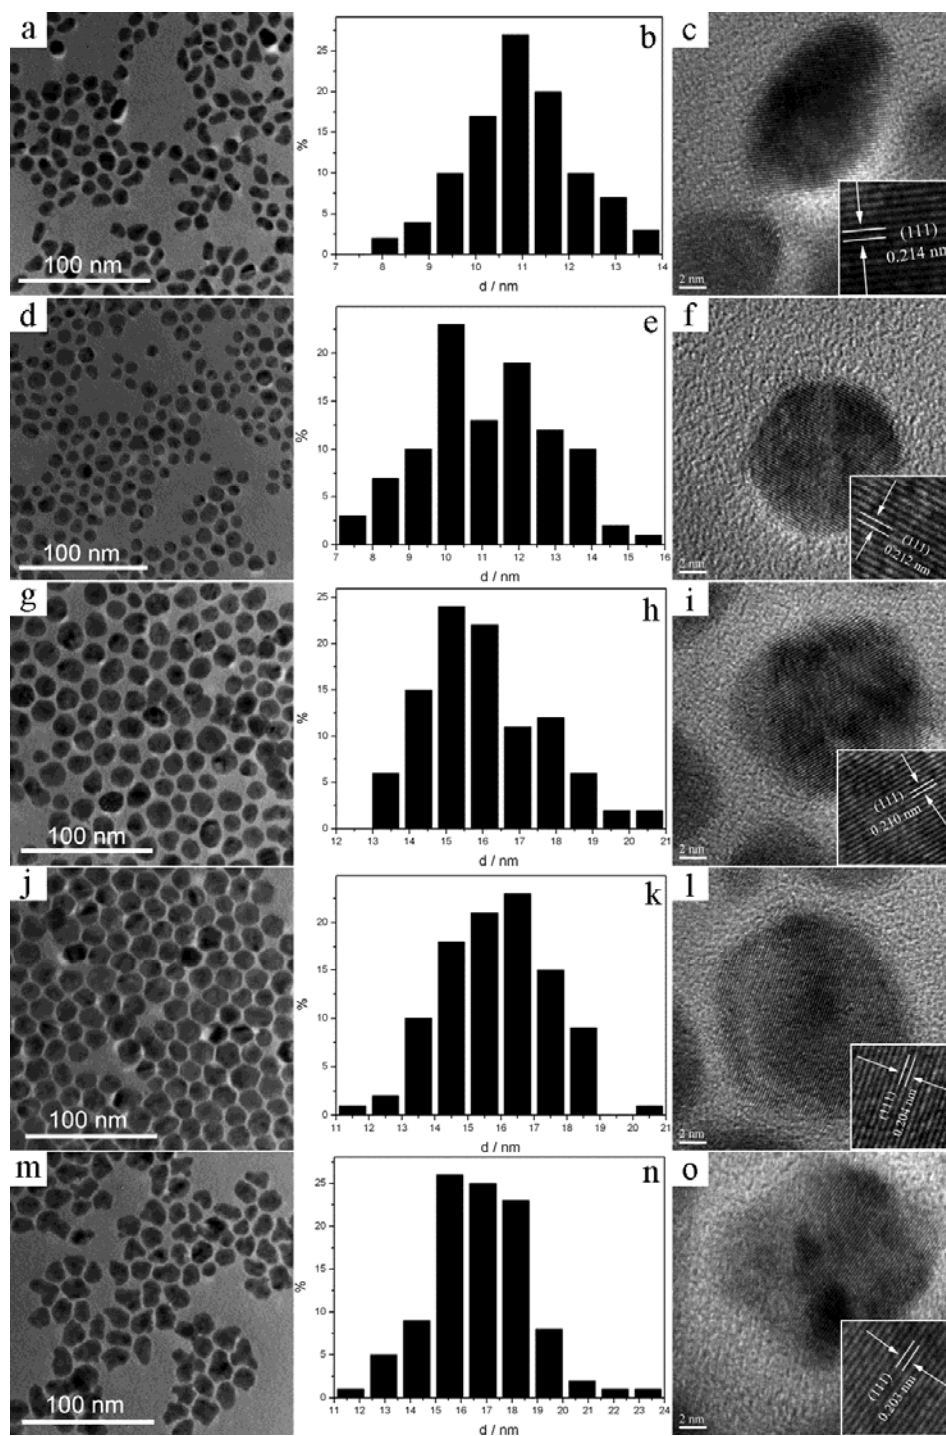

**Fig. S2.** TEM and HRTEM images as well as the particle size distributions of Rh-Ni NCs with different compositions: (a, b, c)  $\text{Rh}_{0.45}\text{Ni}_{0.55}$ ; (d, e, f)  $\text{Rh}_{0.33}\text{Ni}_{0.67}$ ; (g, h, i)  $\text{Rh}_{0.2}\text{Ni}_{0.8}$ ; (j, k, l)  $\text{Rh}_{0.12}\text{Ni}_{0.88}$ ; (m, n, o)  $\text{Rh}_{0.1}\text{Ni}_{0.9}$ .

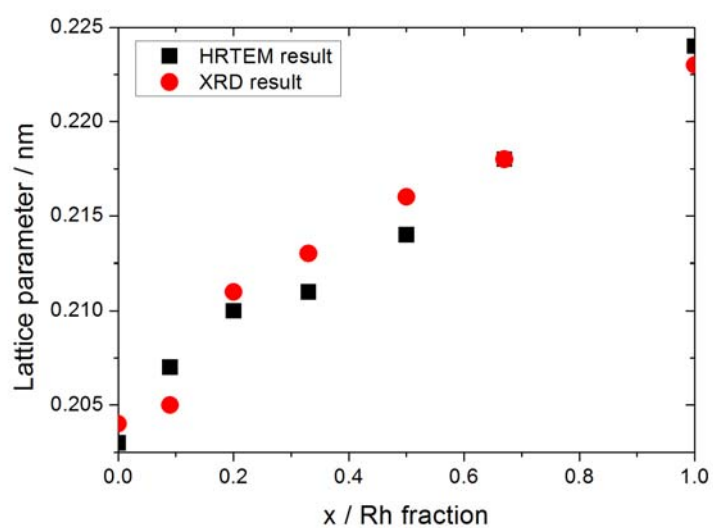

**Fig. S3.** The variation of lattice parameter of  $\text{Rh}_x\text{Ni}_{1-x}$  with composition.

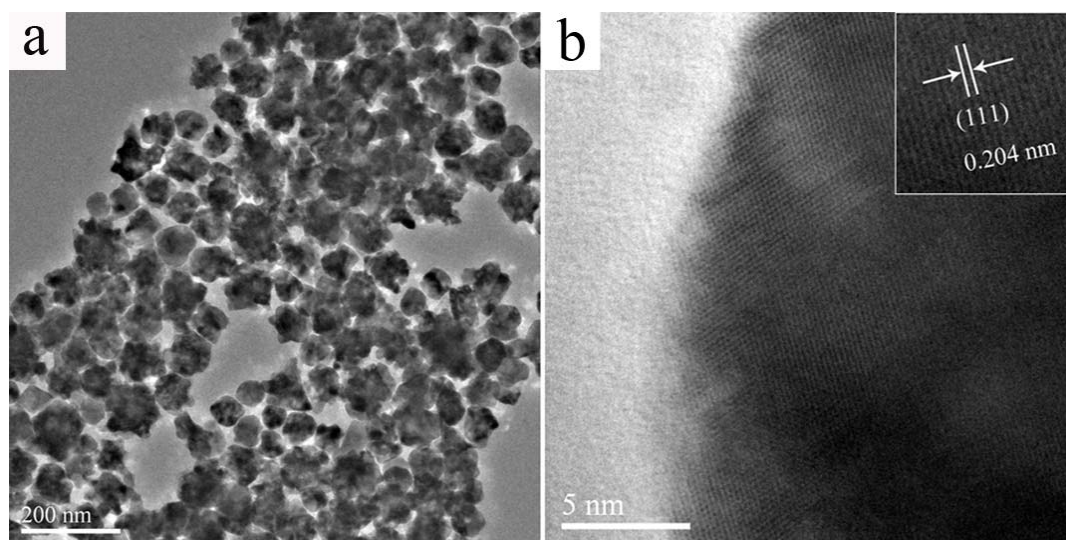

**Fig. S4.** (a) Representative TEM image of as-obtained Ni NCs. (b) HRTEM image of an individual Ni NC. (Inset, enlarged HRTEM image)



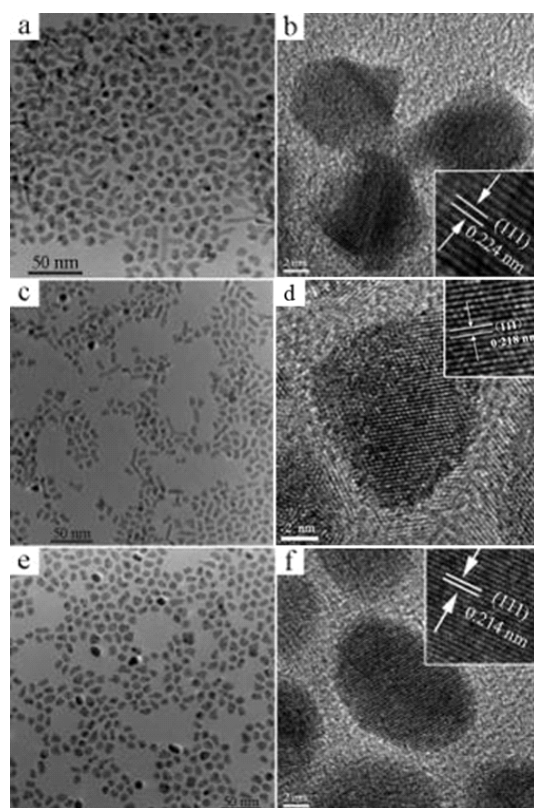

**Fig. S5.** Representative TEM and HRTEM images of (a, b) Rh, (c, d)  $\text{Rh}_{0.67}\text{Ni}_{0.33}$  and (e, f)  $\text{Rh}_{0.5}\text{Ni}_{0.5}$ . (Inset, enlarged HRTEM images)

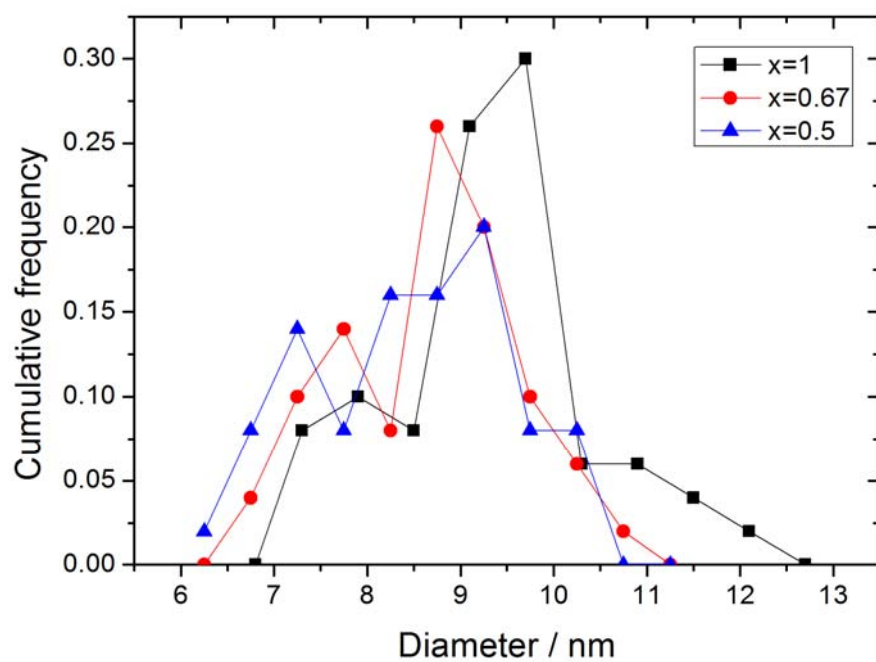

**Fig. S6.** Size distribution for Rh (black),  $\text{Rh}_{0.67}\text{Ni}_{0.33}$  (red) and  $\text{Rh}_{0.5}\text{Ni}_{0.5}$  (blue).

**Table. S1** Hydrogenation of alkenes, nitroarenes and arenes in the presence of Rh<sub>0.67</sub>Ni<sub>0.33</sub> NCs <sup>a</sup>

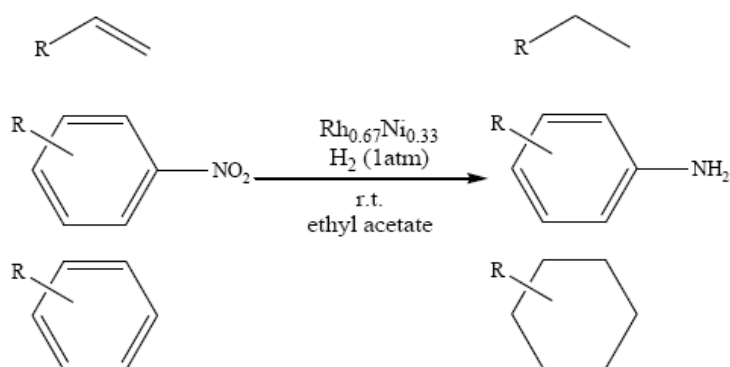

| Entry | Substrate            | Product         | t[h] | Conv <sup>b</sup> [%] | Selectivity <sup>b</sup> | TOF <sup>c</sup><br>[h <sup>-1</sup> ] |
|-------|----------------------|-----------------|------|-----------------------|--------------------------|----------------------------------------|
| 1     | Cyclohexene          | Cyclohexane     | 1    | >99                   | >99                      | 3253                                   |
| 2     | Styrene              | Ethylbenzene    | 0.25 | >99                   | >99                      | 13012                                  |
| 3     | Benzalacetone        | Benzylacetone   | 0.5  | >99                   | >99                      | 6506                                   |
| 4     | Nitrobenzene         | Aniline         | 16   | >99                   | >99                      | 203                                    |
| 5     | 4-Chloronitrobenzene | 4-Chloroaniline | 24   | >99                   | 96.6                     | 136                                    |
|       |                      | Aniline         |      |                       | 3.4                      |                                        |
| 6     | Phenol               | Cyclohexanone   | 24   | 86.5                  | 63.9                     | 117                                    |
|       |                      | Cyclohexanol    |      |                       | 36.1                     |                                        |
| 7     | benzene              | Cyclohexane     | 24   | 21.7                  | >99                      | 29.5                                   |

<sup>a</sup>Reaction conditions: 0.5 mmol of substrate and 0.03 mol% of Rh<sub>0.67</sub>Ni<sub>0.33</sub> nanocatalyst (based on ICP analysis of Rh metal) in 3 mL ethyl acetate at room temperature (25 °C) under 1 atm of H<sub>2</sub>. <sup>b</sup>Determined by GC-MS. <sup>c</sup>TOF measured in [mol product]/[mol metal]<sup>-1</sup>·h<sup>-1</sup>.

**Table. S2** Hydrogenation performance using Rh<sub>0.67</sub>Ni<sub>0.33</sub> NCs nanocatalyst under different hydrogen pressure<sup>a</sup>

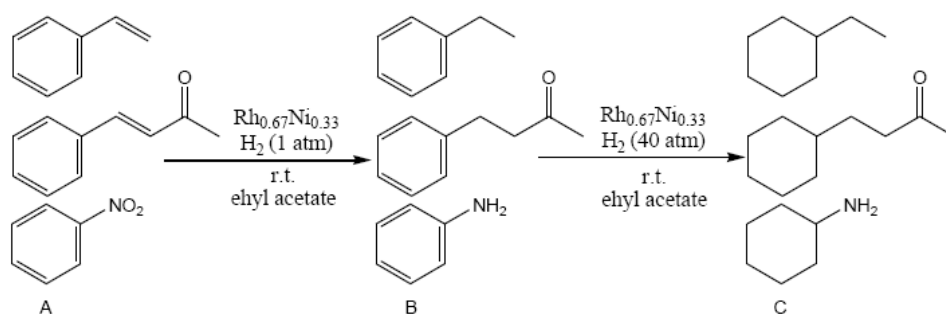

| Entry | Substrate | Pressure<br>(Mpa) | t<br>[h] | Conv. <sup>b</sup><br>[%] | Selectivity <sup>b</sup><br>[%] |      |
|-------|-----------|-------------------|----------|---------------------------|---------------------------------|------|
|       |           |                   |          |                           | B                               | C    |
| 1     |           | 0.1               | 1        | >99                       | >99                             | N.D. |
| 2     |           | 4                 | 1        | >99                       | 91.8                            | 8.2  |
| 3     |           | 0.1               | 0.5      | >99                       | >99                             | N.D. |
| 4     |           | 4                 | 0.5      | >99                       | 83.7                            | 16.3 |
| 5     |           | 0.1               | 24       | >99                       | >99                             | N.D. |
| 6     |           | 4                 | 24       | >99                       | 96.2                            | 3.8  |

<sup>a</sup>0.5 mmol substrates and 0.03 mol% catalyst (based on ICP analysis of Rh metal) in 3 mL ethyl acetate at room temperature (25 °C) under H<sub>2</sub> (1 atm). <sup>b</sup>Determine by GC-MS.

**Table. S3** Recycling of Rh<sub>0.67</sub>Ni<sub>0.33</sub> nanocatalyst in the hydrogenation of styrene<sup>a</sup>

| Cycle | t [h] | Conv. <sup>b</sup> [%] |
|-------|-------|------------------------|
| 1     | 0.5   | 100                    |
| 2     | 0.5   | 98.8                   |
| 3     | 0.5   | 98.2                   |
| 4     | 0.5   | 97.6                   |
| 5     | 0.5   | 97.4                   |

<sup>a</sup>0.5 mmol styrene and 0.03 mol% catalyst (based on ICP analysis of Rh metal) in 3 mL ethyl acetate at room temperature (25 °C) under H<sub>2</sub> (1 atm). <sup>b</sup>Determine by GC-MS.
